# Supplementary material for: Transcriptomic Profile of Whole Blood Cells from Elderly Subjects Fed Probiotic Bacteria Lactobacillus rhamnosus GG ATCC 53103 (LGG) in a Phase I Open Label Study
Source: PubMed Central journal article supplement (PMC4747532; doi:10.1371/journal.pone.0147426), 2016-02-09
Supplement: pone.0147426.s002.pdf [file pone.0147426.s002.pdf]

Figure S2. *Lactobacillus* species tuf-gene alignment used to design *Lactobacillus rhamnosus* specific tuf-gene assay

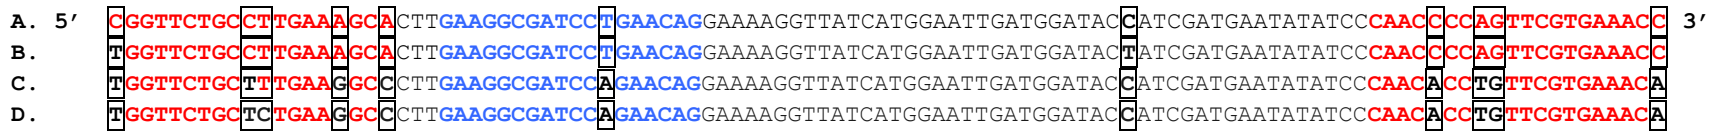

**Taxonomic Key**

- A. *Lactobacillus rhamnosus* GG (ATCC 53103, NC\_017482.1), *L. rhamnosus* LOCK908 (NC\_017491.1), *L. rhamnosus* ATCC 8530 (NC\_017491.1), *L. rhamnosus* LMS2-1, (NZ\_GG692960.1), *L. rhamnosus* Lc 705 (NC\_013199.1)
- B. *L. rhamnosus* LOCK900, (NC\_021723.1)
- C. *L. casei* ATCC 334 (NC\_008526.1)
- D. *L. paracasei* subsp. *paracasei* 8700:2 (NC\_022112.1), *L. casei* LOCK919, (NC\_021721.1), *L. casei* W56, (NC\_018641.1), *L. casei* BD-II, (NC\_017474.1), *Lactobacillus casei* LC2W (NC\_017473.1), *Lactobacillus paracasei* subsp. *paracasei* ATCC 25302 (NZ\_GG670152.1), *Lactobacillus casei* str. Zhang (NC\_014334.1), *Lactobacillus casei* BL23 (NC\_010999.1)

Forward and reverse primer sequences are indicated in red, the probe sequence in blue. Mismatches are indicated as **N**.

Forward-*L. rhamnosus* tuf -222F: CGGTTCTGCCTTGAAAGCA  
 Reverse-*L.rhamnosus*tuf-327R: GGTTTCACGAACTGGGGTTG  
 Probe-*L.rhamnosus* tuf-261revT(MGB): CTGTTTCAGGATCGCCTTC
