# Supplementary material for: Transcriptomic Profile of Whole Blood Cells from Elderly Subjects Fed Probiotic Bacteria Lactobacillus rhamnosus GG ATCC 53103 (LGG) in a Phase I Open Label Study
Source: PubMed Central journal article supplement (PMC4747532; doi:10.1371/journal.pone.0147426), 2016-02-09
Supplement: pone.0147426.s003.pdf [file pone.0147426.s003.pdf]

### 250ng vs 100ng

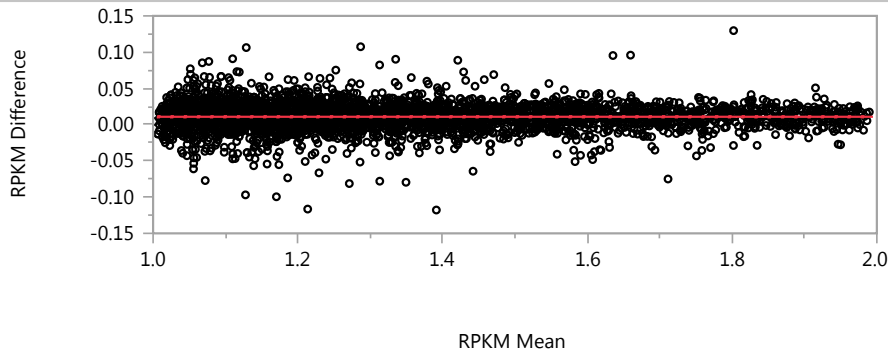

|                   |         |           |          |
|-------------------|---------|-----------|----------|
| Log10(250ng-RPKM) | 1.36895 | t-Ratio   | 27.46905 |
| Log10(100ng-RPKM) | 1.35812 | DF        | 3317     |
| Mean Difference   | 0.01083 | Prob >  t | <.0001 * |
| Std Error         | 0.00039 | Prob > t  | <.0001 * |
| Upper 95%         | 0.01161 | Prob < t  | 1.0000   |
| Lower 95%         | 0.01006 |           |          |
| N                 | 3318    |           |          |
| Correlation       | 0.99599 |           |          |

### 500ng vs 100ng

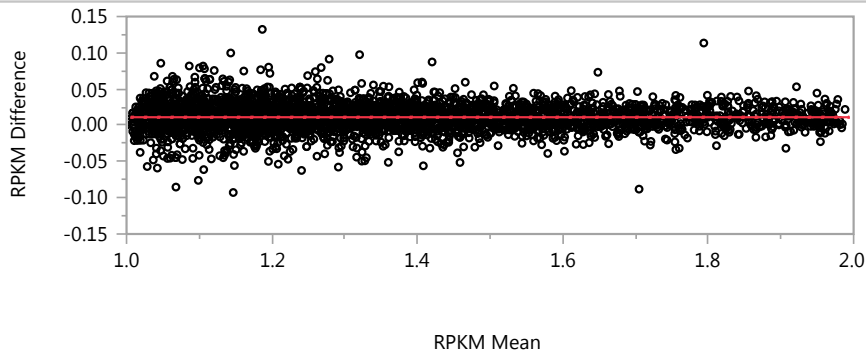

|                   |         |           |          |
|-------------------|---------|-----------|----------|
| Log10(500ng-RPKM) | 1.3692  | t-Ratio   | 30.57384 |
| Log10(100ng-RPKM) | 1.35812 | DF        | 3317     |
| Mean Difference   | 0.01108 | Prob >  t | <.0001 * |
| Std Error         | 0.00036 | Prob > t  | <.0001 * |
| Upper 95%         | 0.01179 | Prob < t  | 1.0000   |
| Lower 95%         | 0.01037 |           |          |
| N                 | 3318    |           |          |
| Correlation       | 0.99662 |           |          |

### 1000ng vs 100ng

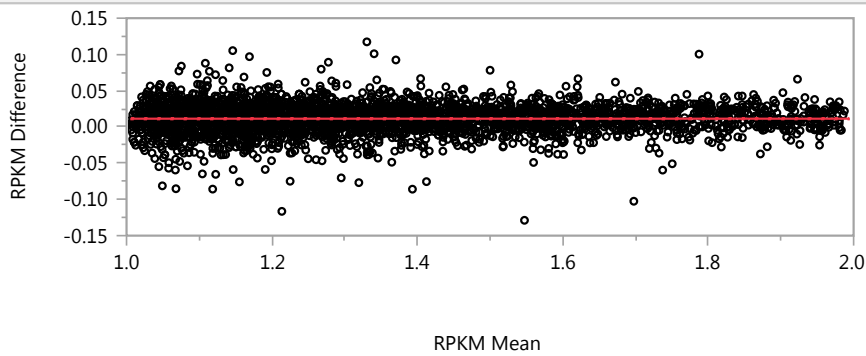

|                    |         |           |          |
|--------------------|---------|-----------|----------|
| Log10(1000ng-RPKM) | 1.36944 | t-Ratio   | 29.05626 |
| Log10(100ng-RPKM)  | 1.35812 | DF        | 3317     |
| Mean Difference    | 0.01133 | Prob >  t | <.0001 * |
| Std Error          | 0.00039 | Prob > t  | <.0001 * |
| Upper 95%          | 0.01209 | Prob < t  | 1.0000   |
| Lower 95%          | 0.01056 |           |          |
| N                  | 3318    |           |          |
| Correlation        | 0.9961  |           |          |

### 500ng vs 250ng

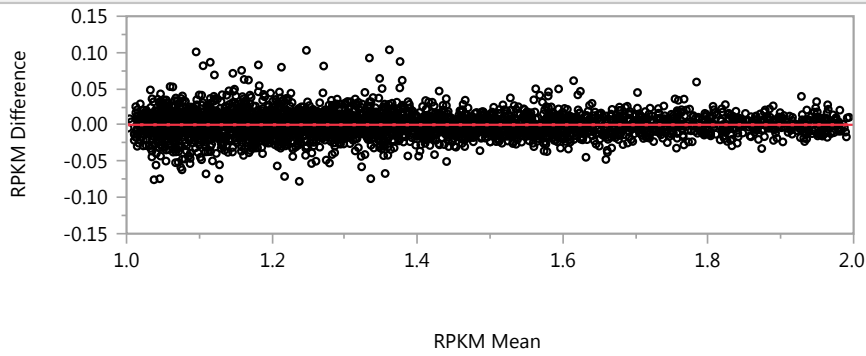

|                   |         |           |          |
|-------------------|---------|-----------|----------|
| Log10(500ng-RPKM) | 1.3692  | t-Ratio   | 0.778139 |
| Log10(250ng-RPKM) | 1.36895 | DF        | 3317     |
| Mean Difference   | 0.00025 | Prob >  t | 0.4365   |
| Std Error         | 0.00032 | Prob > t  | 0.2183   |
| Upper 95%         | 0.00087 | Prob < t  | 0.7817   |
| Lower 95%         | -0.0004 |           |          |
| N                 | 3318    |           |          |
| Correlation       | 0.99741 |           |          |

### 1000ng vs 250ng

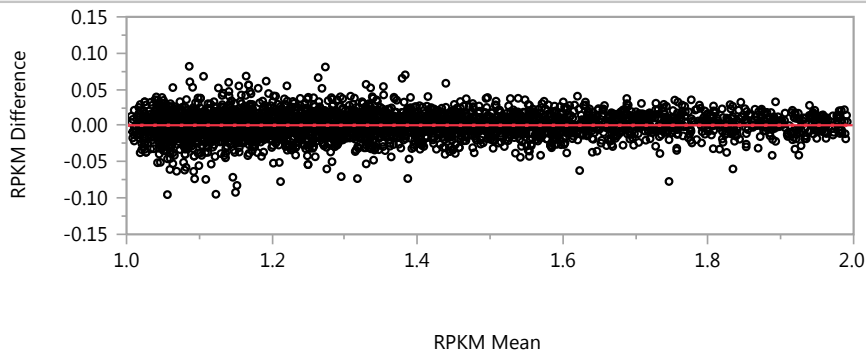

|                    |         |           |        |
|--------------------|---------|-----------|--------|
| Log10(1000ng-RPKM) | 1.36944 | t-Ratio   | 1.3082 |
| Log10(250ng-RPKM)  | 1.36895 | DF        | 3317   |
| Mean Difference    | 0.00049 | Prob >  t | 0.1909 |
| Std Error          | 0.00038 | Prob > t  | 0.0954 |
| Upper 95%          | 0.00123 | Prob < t  | 0.9046 |
| Lower 95%          | -0.0002 |           |        |
| N                  | 3318    |           |        |
| Correlation        | 0.99633 |           |        |

### 1000ng vs 500ng

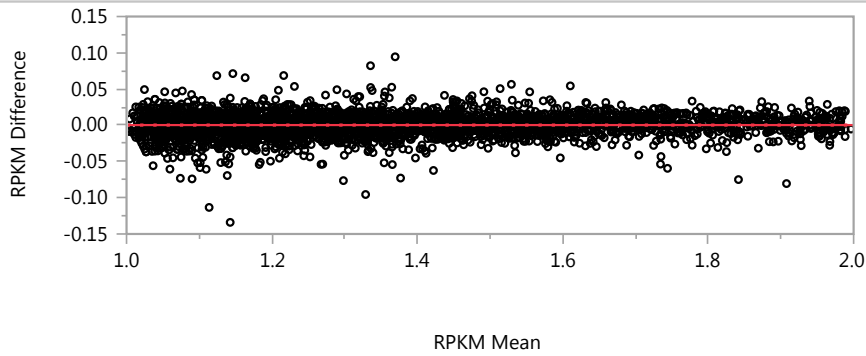

|                    |         |           |          |
|--------------------|---------|-----------|----------|
| Log10(1000ng-RPKM) | 1.36944 | t-Ratio   | 0.708622 |
| Log10(500ng-RPKM)  | 1.3692  | DF        | 3317     |
| Mean Difference    | 0.00025 | Prob >  t | 0.4786   |
| Std Error          | 0.00035 | Prob > t  | 0.2393   |
| Upper 95%          | 0.00093 | Prob < t  | 0.7607   |
| Lower 95%          | -0.0004 |           |          |
| N                  | 3318    |           |          |
| Correlation        | 0.99685 |           |          |
