# Supplementary material for: Transcriptomic Profile of Whole Blood Cells from Elderly Subjects Fed Probiotic Bacteria Lactobacillus rhamnosus GG ATCC 53103 (LGG) in a Phase I Open Label Study
Source: PubMed Central journal article supplement (PMC4747532; doi:10.1371/journal.pone.0147426), 2016-02-09

# Venn Diagram

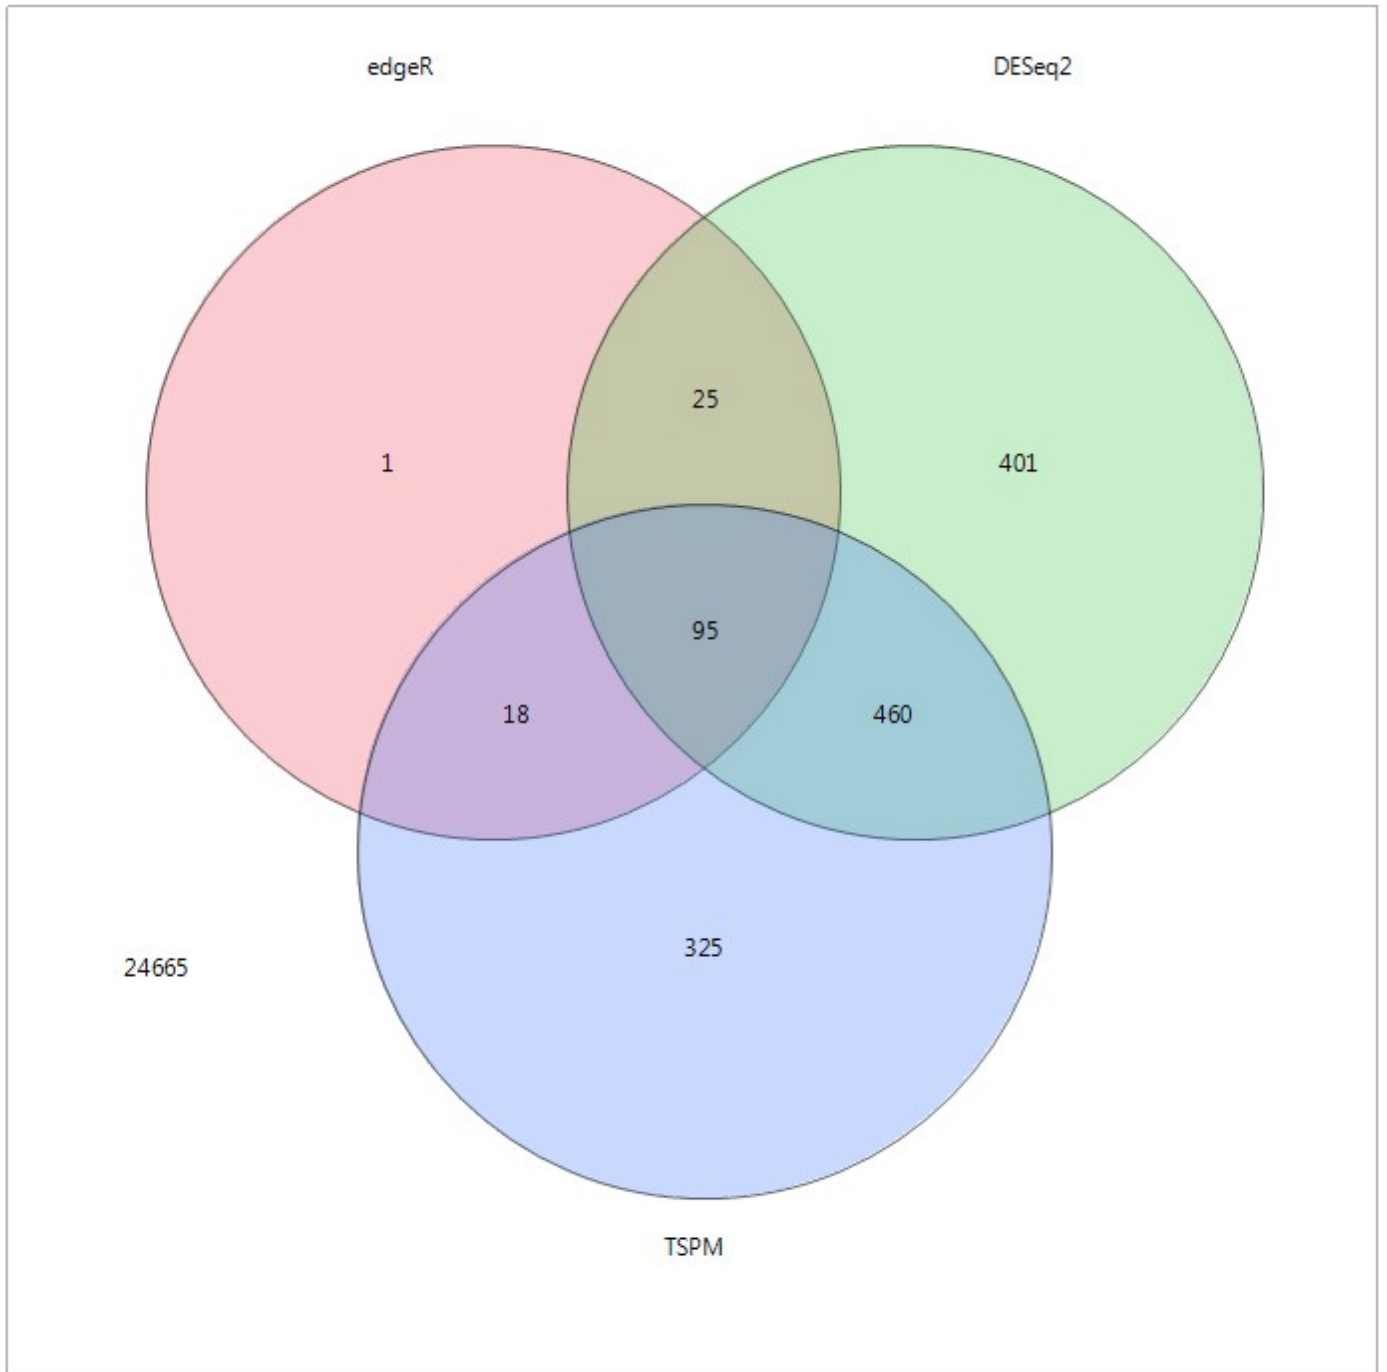

Supplement: pone.0147426.s004.pdf [file pone.0147426.s004.pdf]
