# Supplementary material for: Transcriptomic Profile of Whole Blood Cells from Elderly Subjects Fed Probiotic Bacteria Lactobacillus rhamnosus GG ATCC 53103 (LGG) in a Phase I Open Label Study
Source: PubMed Central journal article supplement (PMC4747532; doi:10.1371/journal.pone.0147426), 2016-02-09
Supplement: pone.0147426.s005.pdf [file pone.0147426.s005.pdf]

| Gene Set Name [# Genes (K)]                              | Description                                                                  | # Genes in Overlap (k) | k/K                                                                                 | p-value               | FDR q-value           |
|----------------------------------------------------------|------------------------------------------------------------------------------|------------------------|-------------------------------------------------------------------------------------|-----------------------|-----------------------|
| <a href="#">HALLMARK_OXIDATIVE_PHOSPHORYLATION [200]</a> | Genes encoding proteins involved in oxidative phosphorylation.               | 16                     |  | 1.49 e <sup>-18</sup> | 7.45 e <sup>-17</sup> |
| <a href="#">HALLMARK_IL2_STAT5_SIGNALING [200]</a>       | Genes up-regulated by STAT5 in response to IL2 stimulation.                  | 7                      |  | 2.42 e <sup>-6</sup>  | 6.04 e <sup>-5</sup>  |
| <a href="#">HALLMARK_ALLOGRAFT_REJECTION [200]</a>       | Genes up-regulated during transplant rejection.                              | 6                      |  | 3.1 e <sup>-5</sup>   | 5.16 e <sup>-4</sup>  |
| <a href="#">HALLMARK_ADIPOGENESIS [200]</a>              | Genes up-regulated during adipocyte differentiation (adipogenesis).          | 5                      |  | 3.37 e <sup>-4</sup>  | 2.81 e <sup>-3</sup>  |
| <a href="#">HALLMARK_INTERFERON_GAMMA_RESPONSE [200]</a> | Genes up-regulated in response to IFNG [GeneID=3458].                        | 5                      |  | 3.37 e <sup>-4</sup>  | 2.81 e <sup>-3</sup>  |
| <a href="#">HALLMARK_MYC_TARGETS_V1 [200]</a>            | A subgroup of genes regulated by MYC - version 1 (v1).                       | 5                      |  | 3.37 e <sup>-4</sup>  | 2.81 e <sup>-3</sup>  |
| <a href="#">HALLMARK_APOPTOSIS [161]</a>                 | Genes mediating programmed cell death (apoptosis) by activation of caspases. | 4                      |  | 1.38 e <sup>-3</sup>  | 9.87 e <sup>-3</sup>  |

| Entrez Gene Id | Gene Symbol | HALLMARK_OXIDATIVE_PHOSPHORYLATION | HALLMARK_IL2_STATS_SIGNALING | HALLMARK_ALLOGRAFT_REJECTION | HALLMARK_ADIPOGENESIS | HALLMARK_INTERFERON_GAMMA_RESPONSE | HALLMARK_MYC_TARGETS_V1 | HALLMARK_APOPTOSIS | Entrez                                                                              | Source | Gene Description                                                                |
|----------------|-------------|------------------------------------|------------------------------|------------------------------|-----------------------|------------------------------------|-------------------------|--------------------|-------------------------------------------------------------------------------------|--------|---------------------------------------------------------------------------------|
| 2879           | GPX4        |                                    |                              |                              |                       |                                    |                         |                    |    | S      | glutathione peroxidase 4 (phospholipid hydroperoxidase)                         |
| 10975          | UQCR11      |                                    |                              |                              |                       |                                    |                         |                    |    | S      | ubiquinol-cytochrome c reductase, complex III subunit XI                        |
| 29796          | UQCR10      |                                    |                              |                              |                       |                                    |                         |                    |    | S      | ubiquinol-cytochrome c reductase, complex III subunit X                         |
| 4713           | NDUFB7      |                                    |                              |                              |                       |                                    |                         |                    |  | S      | NADH dehydrogenase (ubiquinone) 1 beta subcomplex, 7, 18kDa                     |
| 9296           | ATP6V1F     |                                    |                              |                              |                       |                                    |                         |                    |  | S      | ATPase, H+ transporting, lysosomal 14kDa, V1 subunit F                          |
| 1632           | ECI1        |                                    |                              |                              |                       |                                    |                         |                    |  | S      | enoyl-CoA delta isomerase 1                                                     |
| 10476          | ATP5H       |                                    |                              |                              |                       |                                    |                         |                    |  | S      | ATP synthase, H+ transporting, mitochondrial Fo complex, subunit d              |
| 1327           | COX4I1      |                                    |                              |                              |                       |                                    |                         |                    |  | S      | cytochrome c oxidase subunit IV isoform 1                                       |
| 1347           | COX7A2      |                                    |                              |                              |                       |                                    |                         |                    |  | S      | cytochrome c oxidase subunit VIIa polypeptide 2 (liver)                         |
| 1350           | COX7C       |                                    |                              |                              |                       |                                    |                         |                    |  | S      | cytochrome c oxidase subunit VIIc                                               |
| 26517          | TIMM13      |                                    |                              |                              |                       |                                    |                         |                    |  | S      | translocase of inner mitochondrial membrane 13 homolog (yeast)                  |
| 4697           | NDUFA4      |                                    |                              |                              |                       |                                    |                         |                    |  | S      | NADH dehydrogenase (ubiquinone) 1 alpha subcomplex, 4, 9kDa                     |
| 518            | ATP5G3      |                                    |                              |                              |                       |                                    |                         |                    |  | S      | ATP synthase, H+ transporting, mitochondrial Fo complex, subunit C3 (subunit 9) |
| 65003          | MRPL11      |                                    |                              |                              |                       |                                    |                         |                    |  | S      | mitochondrial ribosomal protein L11                                             |
| 9551           | ATP5J2      |                                    |                              |                              |                       |                                    |                         |                    |  | S      | ATP synthase, H+ transporting, mitochondrial Fo complex, subunit F2             |
| 9927           | MFN2        |                                    |                              |                              |                       |                                    |                         |                    |  | S      | mitofusin 2                                                                     |
| 822            | CAPG        |                                    |                              |                              |                       |                                    |                         |                    |  | S      | capping protein (actin filament), gelsolin-like                                 |
| 10410          | IFITM3      |                                    |                              |                              |                       |                                    |                         |                    |  | S      | interferon induced transmembrane protein 3                                      |
| 8809           | IL18R1      |                                    |                              |                              |                       |                                    |                         |                    |  | S      | interleukin 18 receptor 1                                                       |
| 9446           | GSTO1       |                                    |                              |                              |                       |                                    |                         |                    |  | S      | glutathione S-transferase omega 1                                               |

|       |          |  |  |  |  |  |  |  |  |                                                                                     |   |                                                               |
|-------|----------|--|--|--|--|--|--|--|--|-------------------------------------------------------------------------------------|---|---------------------------------------------------------------|
| 1690  | COCH     |  |  |  |  |  |  |  |  |    | S | coagulation factor C homolog, cochlin (Limulus polyphemus)    |
| 974   | CD79B    |  |  |  |  |  |  |  |  |    | S | CD79b molecule, immunoglobulin-associated beta                |
| 3108  | HLA-DMA  |  |  |  |  |  |  |  |  |    | S | major histocompatibility complex, class II, DM alpha          |
| 3109  | HLA-DMB  |  |  |  |  |  |  |  |  |    | S | major histocompatibility complex, class II, DM beta           |
| 3122  | HLA-DRA  |  |  |  |  |  |  |  |  |    | S | major histocompatibility complex, class II, DR alpha          |
| 6203  | RPS9     |  |  |  |  |  |  |  |  |    | S | ribosomal protein S9                                          |
| 9450  | LY86     |  |  |  |  |  |  |  |  |    | S | lymphocyte antigen 86                                         |
| 83871 | RAB34    |  |  |  |  |  |  |  |  |    | S | RAB34, member RAS oncogene family                             |
| 8673  | VAMP8    |  |  |  |  |  |  |  |  |    | S | vesicle-associated membrane protein 8 (endobrevin)            |
| 10791 | VAMP5    |  |  |  |  |  |  |  |  |    | S | vesicle-associated membrane protein 5 (myobrevin)             |
| 3123  | HLA-DRB1 |  |  |  |  |  |  |  |  |    | S | major histocompatibility complex, class II, DR beta 1         |
| 10549 | PRDX4    |  |  |  |  |  |  |  |  |   | S | peroxiredoxin 4                                               |
| 6150  | MRPL23   |  |  |  |  |  |  |  |  |  | S | mitochondrial ribosomal protein L23                           |
| 51690 | LSM7     |  |  |  |  |  |  |  |  |  | S | LSM7 homolog, U6 small nuclear RNA associated (S. cerevisiae) |
| 6175  | RPLP0    |  |  |  |  |  |  |  |  |  | S | ribosomal protein, large, P0                                  |
| 6193  | RPS5     |  |  |  |  |  |  |  |  |  | S | ribosomal protein S5                                          |
| 10018 | BCL2L11  |  |  |  |  |  |  |  |  |  | S | BCL2-like 11 (apoptosis facilitator)                          |
| 4255  | MGMT     |  |  |  |  |  |  |  |  |  | S | O-6-methylguanine-DNA methyltransferase                       |
